# Supplementary material
Source: Springer Nature journal article supplement (https://www.springermedizin.de/resource/supplementary/12913_2013_3112_MOESM1_ESM.pdf/9532466)
Supplement: MOESM1 [file 9532466]

**Total Enrolled**  
**(in both nutrition audit and**  
**barriers questionnaire)**

70 ICUs

**15 ICUs Excluded**

8 No finalized patient data

4 No barriers data

1 ICU from Latin America (only ICU  
from this geographic region)

Combined 3 ICUs in 1 hospital as  
responded to barriers questionnaire as  
single site.

**Total Included**

55 ICUs

1153 Patients

1439 Nurses/Barrier Questionnaires
